# Supplementary material
Source: publisher figshare collection journal article supplement (https://tandf.figshare.com/articles/dataset/_/6683849)
Supplement: Supplementary file 1 [file 1]

**Pre-Post Survey, Living on the Edge Integrate Module****Short Answer:**

- 1. List three types of geologic data that are used to monitor volcanoes.**

Data type 1: \_\_\_\_\_  
 Data type 2: \_\_\_\_\_  
 Data type 3: \_\_\_\_\_

- 2. For each of the three types of data you list above, describe the pattern(s) that would indicate an eruption was about to occur.**

Pattern for data type 1: \_\_\_\_\_  
 \_\_\_\_\_  
 Pattern for data type 2: \_\_\_\_\_  
 \_\_\_\_\_  
 Pattern for data type 3: \_\_\_\_\_  
 \_\_\_\_\_

- 3. List three characteristics of a school building and/or site of a school building that would increase or decrease that building's vulnerability during an earthquake.**

Characteristic 1: \_\_\_\_\_  
 Characteristic 2: \_\_\_\_\_  
 Characteristic 3: \_\_\_\_\_

- 4. For each characteristic you list, explain how that characteristic would affect the building's vulnerability to an earthquake.**

Characteristic 1: \_\_\_\_\_  
 \_\_\_\_\_  
 Characteristic 2: \_\_\_\_\_  
 \_\_\_\_\_  
 Characteristic 3: \_\_\_\_\_  
 \_\_\_\_\_

**Multiple Choice:**

- 5. Which of the following hazards are of major concern to human populations along a *transform* plate boundary. Select all that apply.**

|                |                      |                |
|----------------|----------------------|----------------|
| a. earthquakes | b. tsunami           | c. storm surge |
| d. lava flows  | e. pyroclastic flows | f. tornadoes   |
| g. lahars      |                      |                |

- 6. Which of the following hazards are of major concern to human populations along a *divergent* plate boundary. Select all that apply.**

|                |                      |                |
|----------------|----------------------|----------------|
| a. earthquakes | b. tsunami           | c. storm surge |
| d. lava flows  | e. pyroclastic flows | f. tornadoes   |
| g. lahars      |                      |                |

- 7. Which of the following hazards are of major concern to human populations along a *convergent* plate boundary. Select all that apply.**

|                |                      |                |
|----------------|----------------------|----------------|
| a. earthquakes | b. tsunami           | c. storm surge |
| d. lava flows  | e. pyroclastic flows | f. tornadoes   |
| g. lahars      |                      |                |

**8. Please rate the following statements and briefly explain your responses:**

1 = Strongly disagree    2 = Disagree    3 = Neither agree or disagree    4 = Agree    5 = Strongly agree

|                                                                                 | 1 | 2 | 3 | 4 | 5 | Explain: |
|---------------------------------------------------------------------------------|---|---|---|---|---|----------|
| Monitoring geological activity is likely to be valuable to me personally.       |   |   |   |   |   |          |
| Monitoring geological activity is likely to be valuable to society.             |   |   |   |   |   |          |
| I am confident in identifying factors that determine earthquake <i>hazard</i> . |   |   |   |   |   |          |
| I am confident in identifying factors that determine earthquake <i>risk</i> .   |   |   |   |   |   |          |
| I am confident in identifying factors that determine volcanic <i>hazard</i> .   |   |   |   |   |   |          |
| I am confident in identifying factors that determine volcanic <i>risk</i> .     |   |   |   |   |   |          |

**Demographic Questions:**

9. Are you currently living, or have you ever lived in an area that you know to be susceptible to the following (circle all that apply):

- a. earthquakes                      b. volcanoes

10. Have you ever personally experienced an earthquake or volcanic eruption?

11. What is your major?
